# Supplementary material
Source: bioRxiv or medRxiv preprint supplement (http://biorxiv.org/highwire/filestream/133573/field_highwire_adjunct_files/2/319723-11.pdf)
Supplement: Supplementary file [file 319723-11.pdf]

Table 1: Linear models

**A)** Linear model of purifying selection strength:  $\omega_0$ ; smaller values of  $\omega_0$  indicate stronger purifying selection. Adjusted  $R^2$ : 0.2976,  $p$ -value  $< 2.2 \cdot 10^{-16}$ . Model formula:  $\omega_0 \sim$  gene length + distance from the origin of replication + gene placement on the leading strand + gene placement in the first chromosome + average expression level + average GC content + GC content standard deviation + sum of branch lengths.

|                                         | Estimate | Std. Error | $t$ value | $p$ -value           |
|-----------------------------------------|----------|------------|-----------|----------------------|
| (Intercept)                             | 0.060    | 0.064      | 0.943     | 0.3463               |
| gene length                             | -0.102   | 0.042      | -2.413    | 0.0162               |
| distance from the origin of replication | 0.001    | 0.041      | 0.032     | 0.9742               |
| gene placement on the leading strand    | 0.059    | 0.065      | 0.896     | 0.3707               |
| gene placement in the first chromosome  | -0.096   | 0.076      | -1.267    | 0.2057               |
| average expression level                | -0.075   | 0.033      | -2.247    | 0.0250               |
| average GC content                      | 0.052    | 0.041      | 1.284     | 0.1998               |
| GC content standard deviation           | 0.059    | 0.041      | 1.430     | 0.1532               |
| sum of branch lengths                   | 0.412    | 0.039      | 10.578    | $< 2 \cdot 10^{-16}$ |

**B)** Linear model of average expression level. Adjusted  $R^2$ : 0.1859,  $p$ -value  $< 2.2 \cdot 10^{-16}$ . Model formula: average expression level  $\sim$  gene length + gene placement in the first chromosome + distance from the origin of replication + gene placement on the leading strand + average GC content + LRT statistic value +  $\omega_0$  + sum of branch lengths.

|                                         | Estimate.str | Std. Error | $t$ value | p.value              |
|-----------------------------------------|--------------|------------|-----------|----------------------|
| (Intercept)                             | -0.310       | 0.084      | -3.682    | 0.000256             |
| gene length                             | 0.029        | 0.047      | 0.623     | 0.533667             |
| gene placement in the first chromosome  | 0.505        | 0.099      | 5.102     | $4.75 \cdot 10^{-7}$ |
| distance from the origin of replication | -0.069       | 0.055      | -1.258    | 0.208840             |
| gene placement on the leading strand    | -0.016       | 0.087      | -0.189    | 0.850215             |
| average GC content                      | -0.291       | 0.052      | -5.553    | $4.54 \cdot 10^{-8}$ |
| LRT statistic                           | -0.013       | 0.046      | -0.282    | 0.778420             |
| $\omega_0$                              | -0.134       | 0.060      | -2.249    | 0.024969             |
| sum of branch lengths                   | -0.111       | 0.056      | -1.959    | 0.050658             |
